1 **Supplementary Materials**

2

3 **Zhang et al. Heme regulation of exocrine pancreatic zymogens**

4

5 **Supplementary tables:**

6

Table S1. List of primers

| gene                       | Forward primer                          | Reverse primer                          | Accession no.           | note                         |
|----------------------------|-----------------------------------------|-----------------------------------------|-------------------------|------------------------------|
| <i>cpa5</i> qRT-PCR        | TGGAGGCACTATTGACTGGA                    | GATTGGCTGGCAGAATAAAA                    | ENSDART000000<br>34377  | qRT-PCR                      |
| <i>ctr1l</i> q<br>RT-PCR   | AGCATCCCATCTGGAACTCG                    | CTGGACTCAGAAGAGGCAAT                    | ENSDART000000<br>99425  | qRT-PCR                      |
| <i>ctrb1</i> qRT-PCR       | TCGCCGAGACCAACGACAAC                    | GCTGGAGCAGGGCAGGAGTA                    | ENSDART000000<br>37346  | qRT-PCR                      |
| <i>ela2l</i> qRT-PCR       | CTGAGCCAGGAGGAGAACGG                    | TCAGGGCGATGTCATTACGG                    | ENSDART000000<br>79293  | qRT-PCR                      |
| <i>try</i><br>qRT-PCR      | CTGATGTGCCTGAATGCTCC                    | CCTTGCTCCCTCCATAAAA                     | ENSDART000000<br>77661  | qRT-PCR                      |
| <i>tryl</i> q<br>RT-PCR    | GAATCATCCTGGTGTTCAG                     | TATTTGGAGGCTGTATGTGA                    | ENSDART000001<br>48846  | qRT-PCR                      |
| <i>exdpf</i> qRT-PCR       | GTTTACCCGACCAACCTT                      | CATTTTCCCGTCCTCTA                       | ENSDART000000<br>32996  | qRT-PCR                      |
| <i>actb1</i> qRT-PCR       | ACGAACGACCAACCTAAACCTCT                 | TTAGACAACACTCCCTTTCC                    | ENSDART000000<br>54987  | qRT-PCR                      |
| <i>bach1b</i> RNA<br>probe | TTGCCTCACAGTAAGAAGGT                    | GTAGTAAACGCTGCTCCATC                    | ENSDART000000<br>47541  | probe<br>making              |
| <i>nrf2a</i> RNA probe     | GGAGGAGATGGAAGGAAGTC                    | TAAGGCGAGGAACTAGGAAA                    | ENSDART000000<br>62854  | probe<br>making              |
| <i>mafK</i> RNA probe      | TTGTCAAGTCTGCCAATCAC                    | CACCAAGAACAAGAGCAAC                     | ENSDART000001<br>32619  | probe<br>making              |
| <i>bach1b</i> 5'-RACE      | CGAACCAGTGACCTTCTTACTGTGA<br>GGCAA      |                                         | ENSDART000000<br>47541  | 5'-RACE                      |
| <i>bach1b</i> 3'-RACE      | TGTTGTTTTAGATGGAGCAGCGTTT<br>ACTAC      |                                         | ENSDART000000<br>47541  | 3'-RACE                      |
| <i>bach1b</i> ORF          | ACTCAAGATGTCGGTGGA                      | CAGTGAAAGGCACTGTAAAT                    |                         | <i>bach1b</i> CDS<br>cloning |
| <i>bach1b</i> intron1      | CACCCGAAAGCATTGTCATC                    | GGAGCAGGAAATCAAAGCAG                    | ENSDARG000000<br>002196 | <i>bach1b</i><br>intron1     |
| <i>ctr1l</i> -MARE         | CGGTACCAATTGAATGCATTTATGA<br>AGAAACATAG | TGCTAGCCCCTACCTCTAAACCCAA<br>CCC        | ENSDARG000000<br>068680 | Promoter<br>cloning          |
| <i>ctr1l</i> -Basic        | TGCTAGCCTGAAAAATGTTCCACGA<br>CCC        | TCTCGAGAAAAGCATTATCTGAAGT<br>ATACCCATCT | ENSDARG000000<br>068680 | Promoter<br>cloning          |
| <i>tryl</i> -MARE          | CGGTACCTTTTTGAGTTTTGTATTTT<br>TGATATTG  | TGCTAGCGGCAGCAGTTGACCTAAA<br>ATGTG      | ENSDARG000000<br>079274 | Promoter<br>cloning          |
| <i>tryl</i> -Basic         | TGCTAGCGCCATAACTGAGACCACC<br>TGA        | TCTCGAGAGGGCTGGGAATTAGGC<br>TGACACTC    | ENSDARG000000<br>079274 | Promoter<br>cloning          |
| <i>ctr1l</i> -MARE1        | AAAAAAAAACATTGACCGAACCTAA<br>A          | TACAGTAATGAGCTGTGATATTTGG<br>A          | ENSDARG000000<br>068680 | Promoter<br>cloning          |
| <i>ctr1l</i> -MARE2        | TTTTTGTGACCGAACCTAAATCGA                | TTTTAACCAAGTACTATTGTTTAC                | ENSDARG000000           | Promoter                     |

|                     |                                |                                |                        |                                   |
|---------------------|--------------------------------|--------------------------------|------------------------|-----------------------------------|
|                     |                                |                                | 068680                 | cloning                           |
| <i>tryI</i> -MARE1  | GTATGTAATGACCGAAGTAATGAAA<br>T | AAAAATGGTGAAGTAGTTGTCAAAA<br>T | ENSDARG00000<br>079274 | Promoter<br>cloning               |
| <i>cpa5</i> ChIP    | GCGCATCTCCTGTGCTAAAC           | TGCAATACCACAGTGAGCCT           | ENSDARG00000<br>021339 | ChIP<br>analysis                  |
| <i>ctr1l</i> ChIP   | TAATGTGCCACAGCCATTAA           | GCAGGGGTCTTTGGGTTGAT           | ENSDARG00000<br>068680 | ChIP<br>analysis                  |
| <i>ctrb1</i> ChIP   | TATGCAGAGCCACAGATATT           | GTTGACTGAAGGAAAACAGA           | ENSDARG00000<br>090428 | ChIP<br>analysis                  |
| <i>ela2l</i> ChIP   | AACAACATGATAGGGCAAGA           | CCTCAACTGGAAGATGTCTC           | ENSDARG00000<br>056765 | ChIP<br>analysis                  |
| <i>try</i> ChIP     | GCACAGGGTCCTCACAAC             | AGCGGAATGAATCACCAACT           | ENSDARG00000<br>042993 | ChIP<br>analysis                  |
| <i>tryI</i> ChIP    | AACGATTCTTGTTTTGCC             | GAAACCCAGCACCATTCTCC           | ENSDARG00000<br>079274 | ChIP<br>analysis                  |
| <i>Hs-BACH1</i> ORF | ATGTCTCTGAGTGAGAACTCGGTTT      | TTACTCATCAGTAGTACATTATCA       | ENST000002868<br>00    | <i>Hs-BACH1</i><br>ORF<br>cloning |

8  
9  
10  
11  
12  
13  
14  
15  
16  
17  
18  
19  
20  
21  
22  
23  
24  
25  
26  
27  
28  
29  
30  
31  
32  
33

34  
35

**Table. S2. *Bach1* genes used in the phylogenetic analysis\***

| <b>Species</b>                | <b>Gene name</b> | <b>Ensembl Gene ID</b> | <b>Transcript length (bps)</b> | <b>Peptide length (aa)</b> |
|-------------------------------|------------------|------------------------|--------------------------------|----------------------------|
| <i>Homo sapiens</i>           | <i>BACH1</i>     | ENSG00000156273        | 5669                           | 736                        |
| <i>Mus musculus</i>           | <i>Bach1</i>     | ENSMUSG00000025612     | 5867                           | 739                        |
| <i>Rattus norvegicus</i>      | <i>Bach1</i>     | ENSRNOG00000001582     | 3232                           | 739                        |
| <i>Xenopus tropicalis</i>     | <i>bach1</i>     | ENSXETG00000020266     | 5689                           | 720                        |
| <i>Tetraodon nigroviridis</i> | <i>bach1b</i>    | ENSTNIG00000001421     | 1824                           | 608                        |
| <i>Tetraodon nigroviridis</i> | <i>bach1a</i>    | ENSTNIG00000019024     | 1719                           | 573                        |
| <i>Takifugu rubripes</i>      | <i>bach1b</i>    | ENSTRUG00000009007     | 1712                           | 564                        |
| <i>Takifugu rubripes</i>      | <i>bach1a</i>    | ENSTRUG00000014936     | 1776                           | 592                        |
| <i>Oreochromis niloticus</i>  | <i>bach1a</i>    | ENSONIG00000005635     | 1770                           | 590                        |
| <i>Oreochromis niloticus</i>  | <i>bach1b</i>    | ENSONIG00000004708     | 1872                           | 624                        |
| <i>Oryzias latipes</i>        | <i>bach1a</i>    | ENSORLG00000003339     | 1727                           | 548                        |
| <i>Oryzias latipes</i>        | <i>bach1b</i>    | ENSORLG00000004475     | 2052                           | 684                        |
| <i>Gasterosteus aculeatus</i> | <i>bach1a</i>    | ENSGACG00000011798     | 1758                           | 586                        |
| <i>Danio rerio</i>            | <i>bach1a</i>    | ENSDARG000000062553    | 6074                           | 676                        |
| <i>Danio rerio</i>            | <i>bach1b</i>    | ENSDARG00000002196     | 2832                           | 632                        |
| <i>Ciona intestinalis</i>     | <i>bach</i>      | ENSCING00000006014     | 2436                           | 508                        |
| <i>Ciona savignyi</i>         | <i>bach</i>      | ENSCSAVG00000006130    | 2062                           | 651                        |

36  
37  
38  
39  
40  
41  
42  
43  
44  
45  
46  
47  
48  
49  
50  
51  
52  
53  
54  
55  
56

\* Note: All information is from ensembl (<http://www.ensembl.org/index.html>).

**Supplementary Fig. legends:**

57

58 **Fig. S1. Efficacy of the *bach1b* SPL MO and the similar knockdown effect by the**  
59 ***bach1b* ATG MO.** (A) Specific primers flanking the *bach1b* intron 2 splicing site  
60 were used to assess the efficacy of *bach1b* SPL MO. (B) In wild-type embryos, only  
61 the 183bp fragment was amplified (line 1), while in SPL MO-injected embryos (line  
62 2), an additional 2, 205bp fragment also was amplified. DNA sequencing analysis  
63 confirmed that part of the 2, 205bp fragment indeed were from the *bach1b* intron 2  
64 sequences, and a premature stop codon resulted in a short peptide of only 88 amino  
65 acids. (C) Effective knockdown *bach1b* by the ATG MO, as shown by significant  
66 upregulation of these six zymogens in the *bach1b* ATG morphant.

67

68 **Fig. S2. Exocrine pancreas-specific downregulation or upregulation of *ctr1l*,**  
69 ***ctrb1*, *ela2l*, *try* and *tryl* resulted from overexpression or knockdown of *bach1b***  
70 **and *nrf2a*, revealed by *in situ* hybridization.** Representative images of *in situ*  
71 hybridization staining show that upregulation or downregulation of *ctr1l*, *ctrb1*, *ela2l*,  
72 *try* and *tryl* specifically in the zebrafish exocrine pancreas. Downregulation of *ctr1l*,  
73 *ctrb1*, *ela2l*, *try* and *tryl* specifically in the exocrine pancreas resulted from *bach1b*  
74 overexpression and *nrf2a* knockdown, and upregulation of *ctr1l*, *ctrb1*, *ela2l*, *try* and  
75 *tryl* specifically in the exocrine pancreas resulted from *nrf2a* overexpression and  
76 *bach1b* knockdown. Dorsal view, anterior to left. All larvae were 84 HPF.

77

78 **Fig. S3.** (A) Mean optic densities of *in situ* hybridization staining of a group of larvae  
79 (10-15 each) for *ctr1l*, *ctrb1*, *ela2l*, *try* and *tryl* from the overexpression or  
80 knockdown of *bach1a* and *nrf2a* corresponding to Fig. S2, quantified with NIH  
81 ImageJ. Statistical significance of difference between means was determined by  
82 one-way ANOVA and Tukey's multiple comparison test (n=12) with SPSS10.0.1. \*  
83 P<0.05, \*\* P<0.01, \*\*\* P<0.001. (B) Morphant phenotypes for *ctr1l*, *ctrb1*, *ela2l*, *try*  
84 and *tryl* from the overexpression or knockdown of *bach1a* and *nrf2a*. The same  
85 method as described in the Fig. 4E legend was used to classify the 'strong', 'medium'  
86 and 'weak' categories of the morphant phenotypes. For each group, more than 50% of  
87 larvae display 'strong' and 'medium' effects for these five peptidase precursor genes  
88 resulted from knockdown or overexpression experiments.

89

90 **Fig. S4. Schematic diagram of MARE (TGCTGA (C/G) TCAGCA) or MARE**  
91 **like (CTGAN/NTCAG) sites in the 5' regulatory regions of these six peptidase**  
92 **precursor genes.** All sequences were downloaded from ensembl

93 (<http://www.ensembl.org/index.html>).

94

95 **Fig. S5. MARE-dependent regulation of the *tryl* promoter activity by heme,**  
96 **Bach1b and Nrf2a.** (A) Activities of the *tryl* promoter increase with increasing the  
97 amount of hemin used. (B) The *tryl* promoter's activities require the presence of the  
98 MARE site, and the *tryl* promoter with MARE displays stronger activities than that  
99 with mutated MARE. (C) Co-transfection of *mafK* and *nrf2a* enhances the *tryl*  
100 promoters' activities, while co-transfection of *mafK* and *bach1b* represses *tryl*

101 promoters' activities. Higher concentrations of Bach1a are able to outcompete Nrf2a,  
102 *vice versa*. Activities of the *tryl* promoter increase with increasing the concentration of  
103 *nrf2a* transfected, but decrease with increasing the concentration of *bach1b* plasmid  
104 transfected. The *tryl*-luc construct contains the 5' upstream 1, 604bp harboring 1  
105 MARE (-6, 371bp ~ -4, 768bp) and 1, 077bp basic promoter region (-886bp ~191bp)  
106 isolated from zebrafish genome DNA (See MATERIALS AND METHODS). +,  
107 quantity of plasmid transfected is 100ng, ++, quantity of plasmid transfected is 200ng,  
108 and +++, quantity of plasmid transfected is 400ng. Hemin treatment can increase the  
109 activities of the *tryl* promoter in all cases. Student's *t* tests were conducted. †† $P<0.01$ ,  
110 ††† $P<0.001$  compared with no hemin. \*\*\* $P<0.001$  compared with line 3, in which  
111 group only *tryl*-luc and *MafK* were added. •• $P<0.001$ .

112

113 **Fig. S6. ChIP analyses with *ctr1l*, *ctrb1*, *ela2l*, *try* and *tryl*.** (A) Electrophoresis  
114 analyses of ChIP results with *ctr1l*, *ctrb1*, *ela2l*, *try* and *tryl*. Much more Nrf2a  
115 proteins were shown to be associated with these peptidase precursor gene promoters  
116 harboring MARE sites than Bach1b in wild type control larvae; while much more  
117 Bach1b proteins were shown to be associated with these promoters harboring MARE  
118 sites than Nrf2a in heme-deficient *yquem/urod* (-/-) larvae. Moreover, treatment of the  
119 heme-deficient *yquem/urod* (-/-) larvae with hemin can reverse the situation so that  
120 more Nrf2a proteins were associated with these promoter harboring MARE sites in  
121 hemin-treated *yquem/urod* (-/-) larvae than Bach1b. qRT-PCR analyses of the ChIP  
122 results with *ctr1l* (B), *ctrb1* (C), *ela2l* (D), *try* (E) and *tryl* (F). The results of these

123 qRT-PCR analyses are consistent with the gel electrophoresis analyses shown in Fig.

124 S6A. Student's *t* tests were conducted. \*\*\* $P < 0.001$ .

125

126 **Fig. S7.** (A) Representative images of *in situ* hybridization staining indicate

127 downregulation of *exdpf* in zebrafish *yquem/urod* (-/-). Despite the expression of

128 *exdpf* elsewhere in larvae, it is the exocrine pancreatic expression that is most affected

129 in the mutant fish. Dorsal view, anterior to left. (B) Mean optic densities of *in situ*

130 hybridization staining of a group of larvae (10-12 each) corresponding to Fig. S7A

131 quantified with ImageJ. Student's *t* tests were conducted. \*  $P < 0.05$ . These *in situ*

132 hybridization results are consistent with the qRT-PCR results shown in Fig. 7B. All

133 larvae were at 84 HPF (hours postfertilization).

134

135

136



137 Fig. S1.  
138

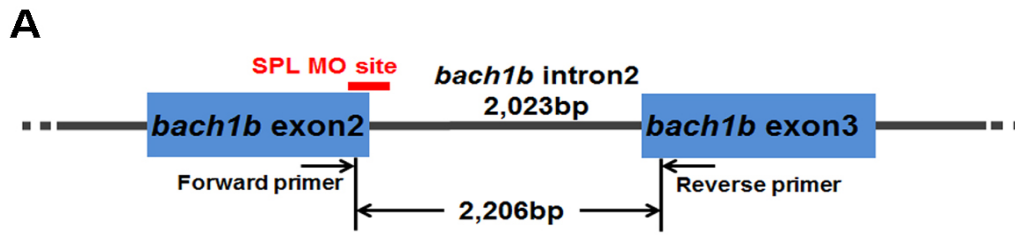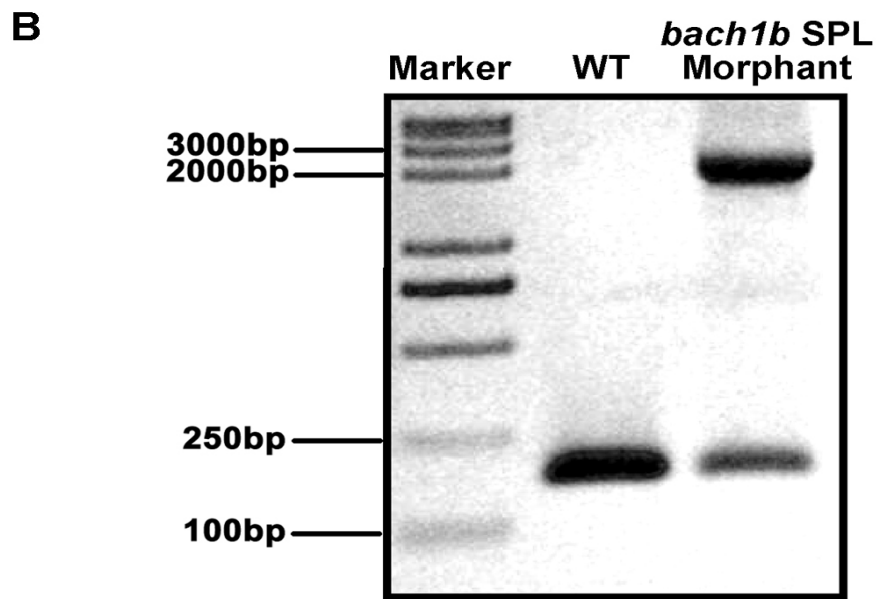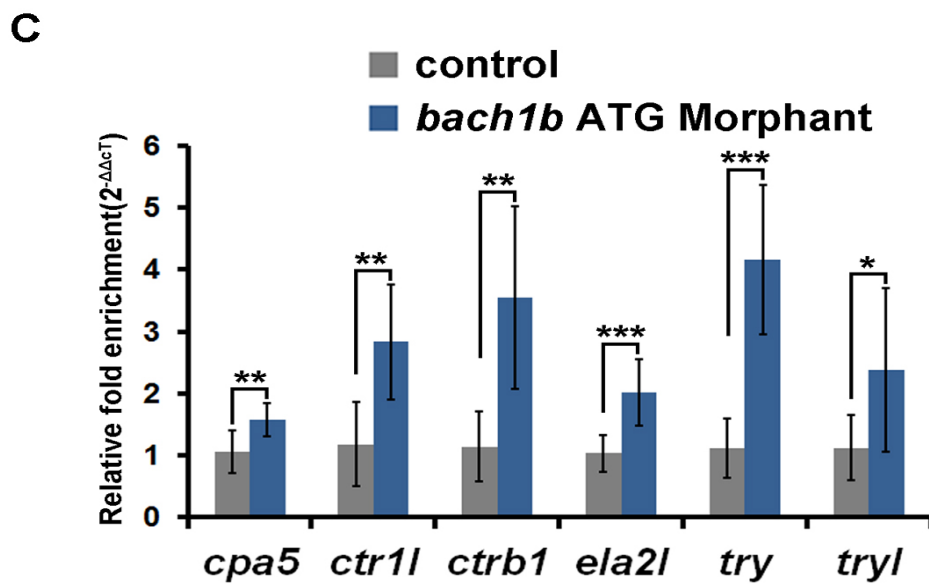

139 Fig. S2.  
140

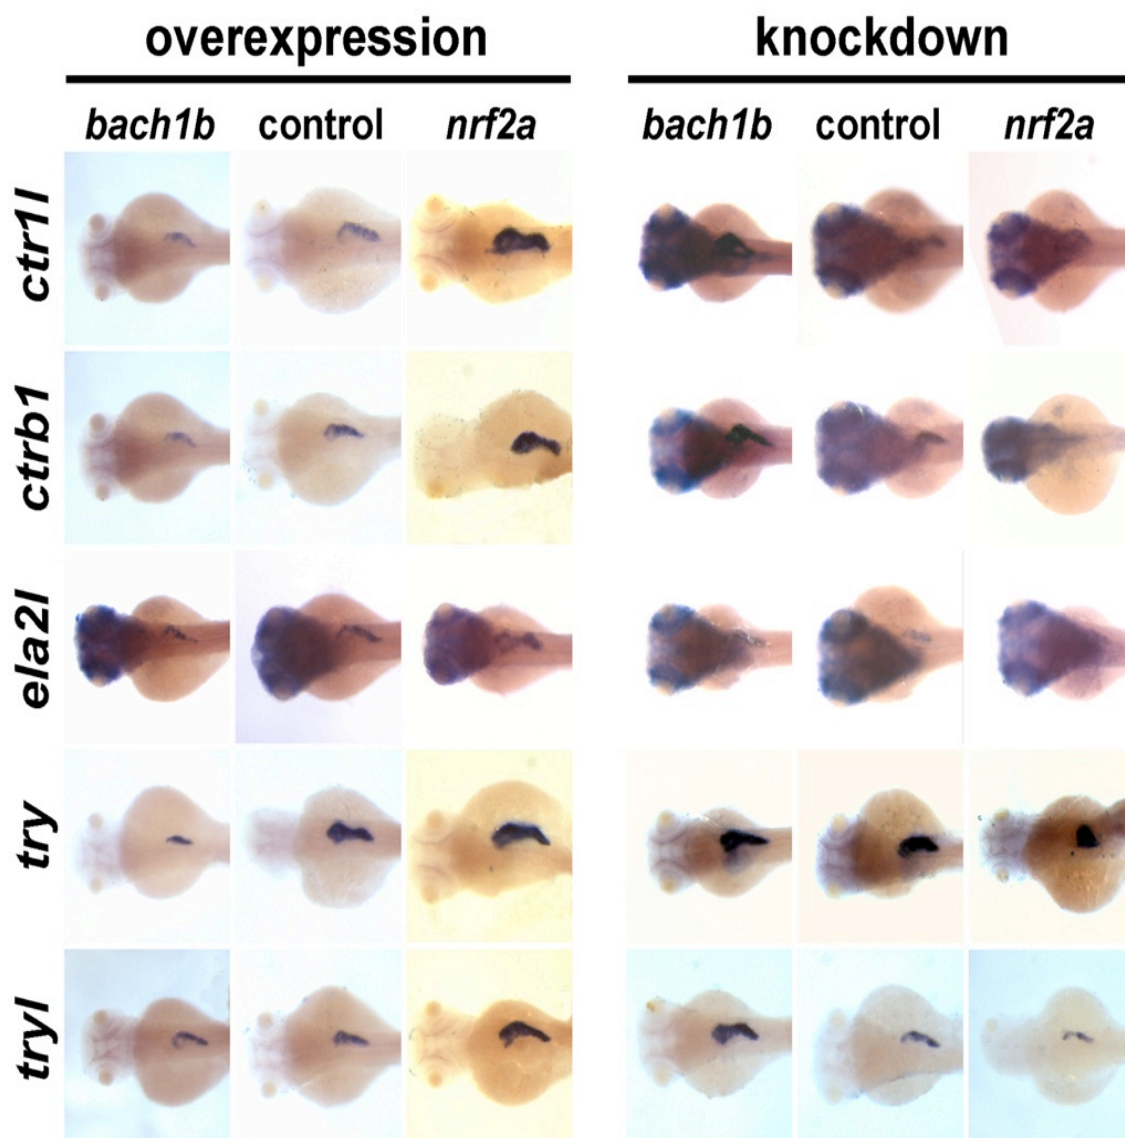

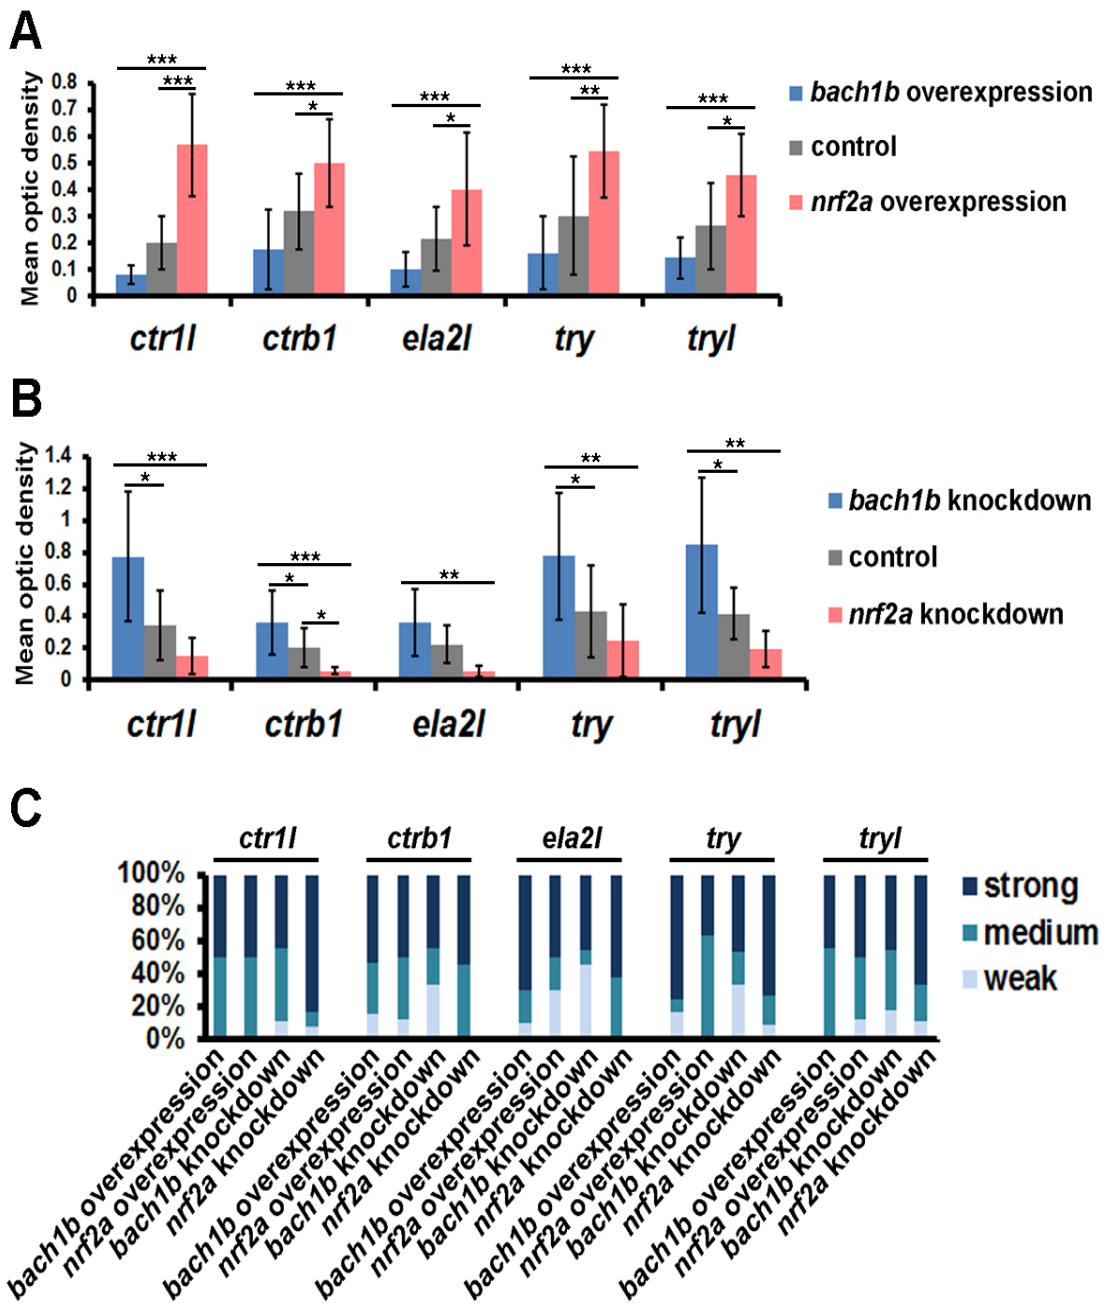

143 Fig. S4.  
144

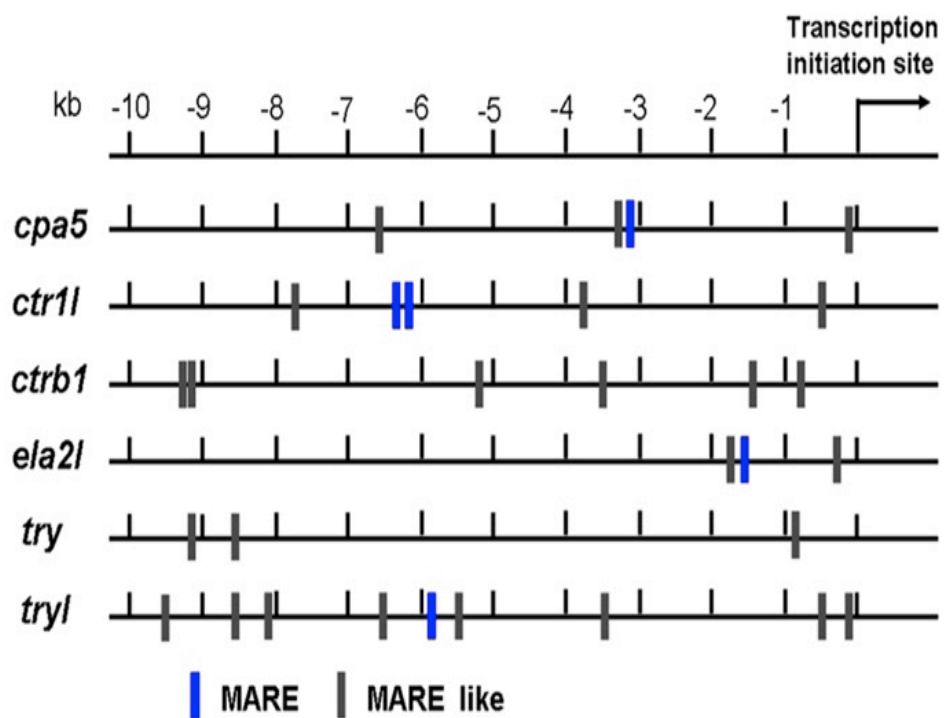

145 Fig. S5.  
 146

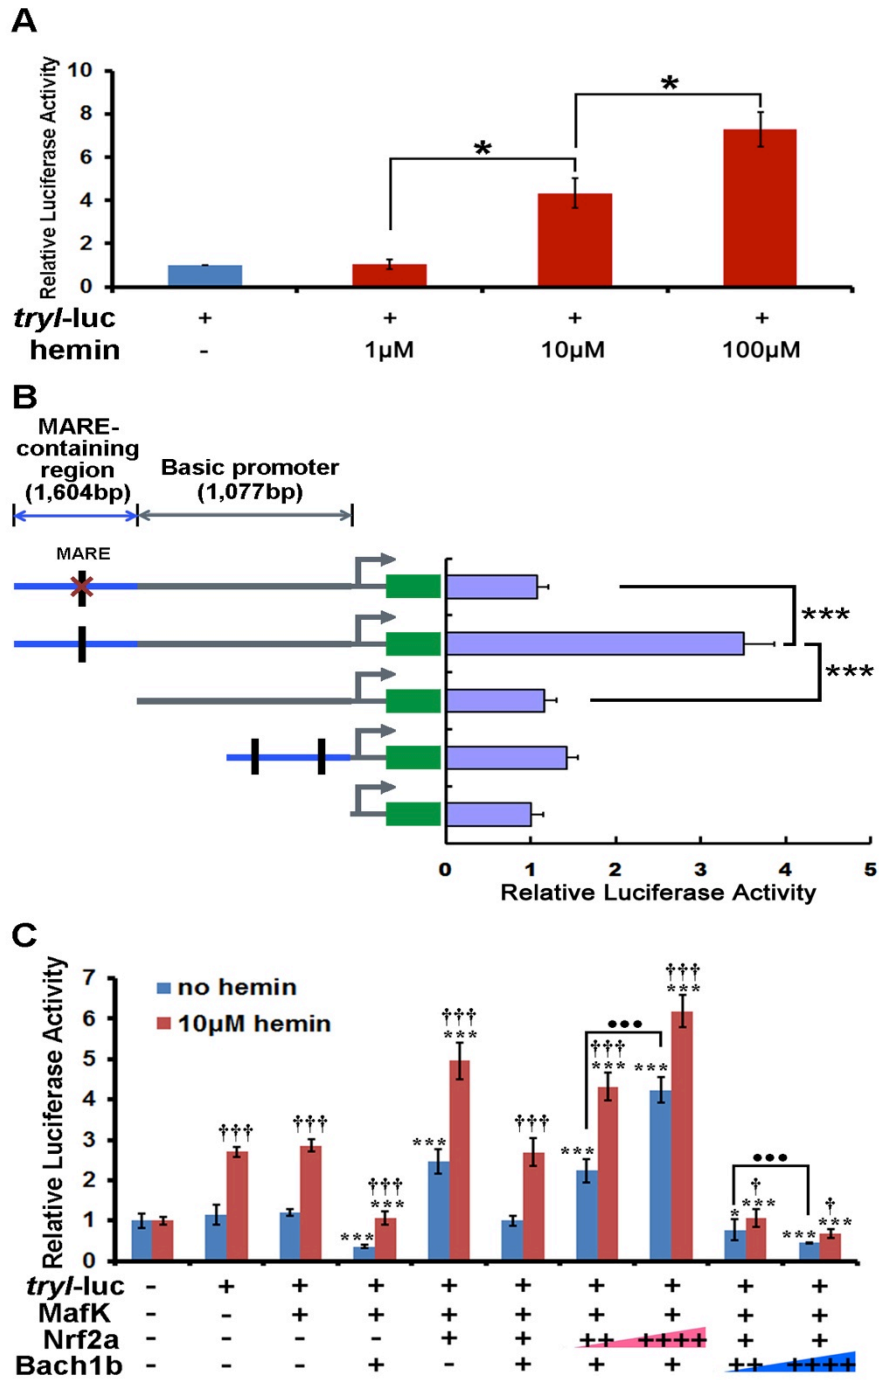

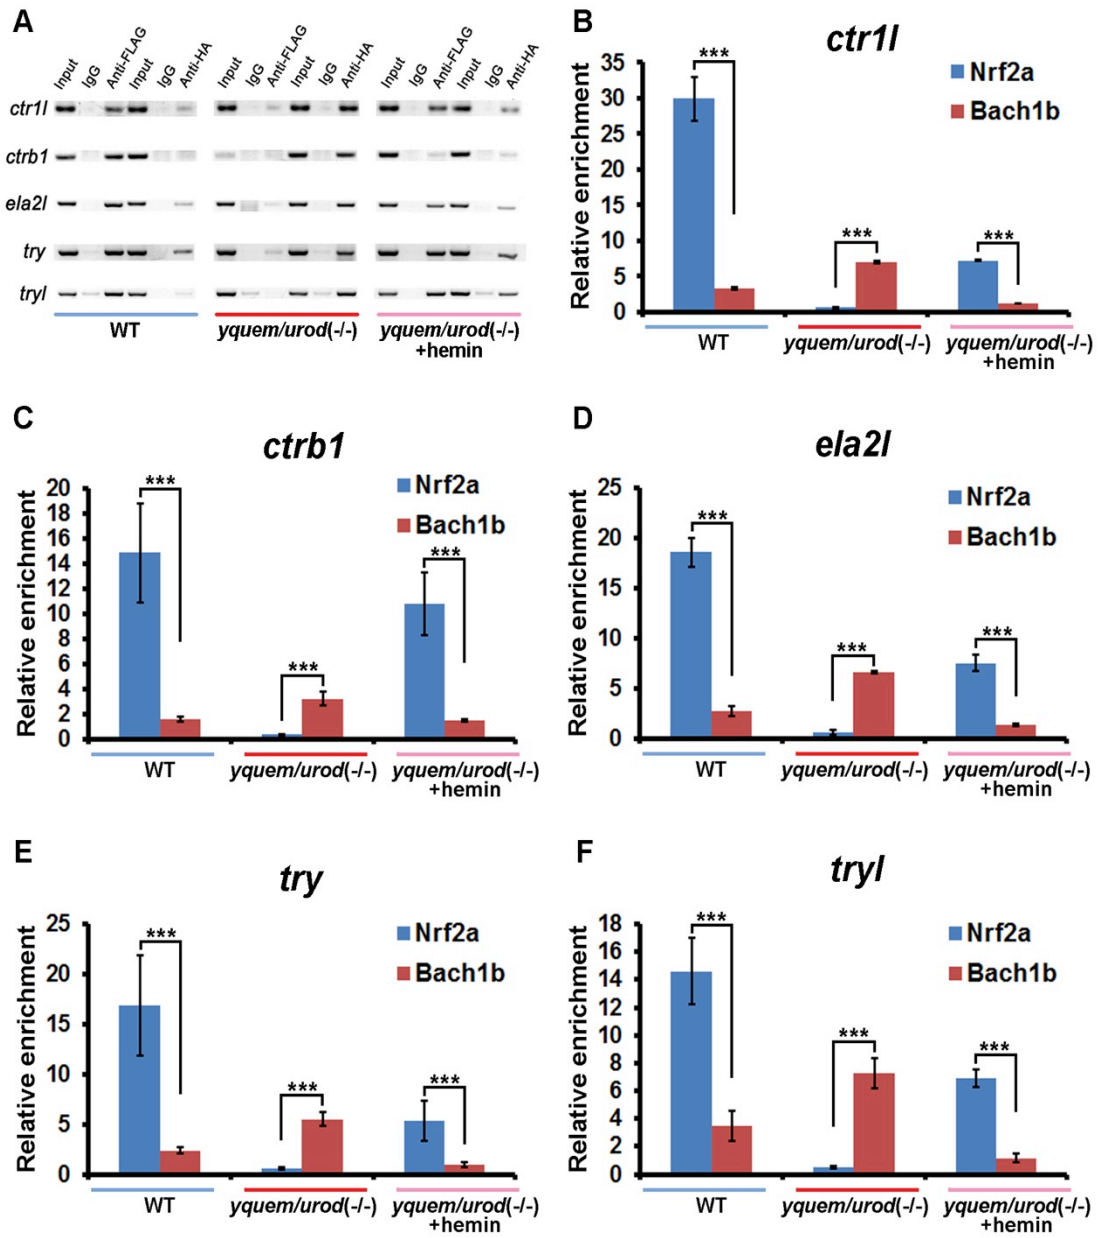

149 Fig. S.7.

150

151

152

153

154

155

156

157

158

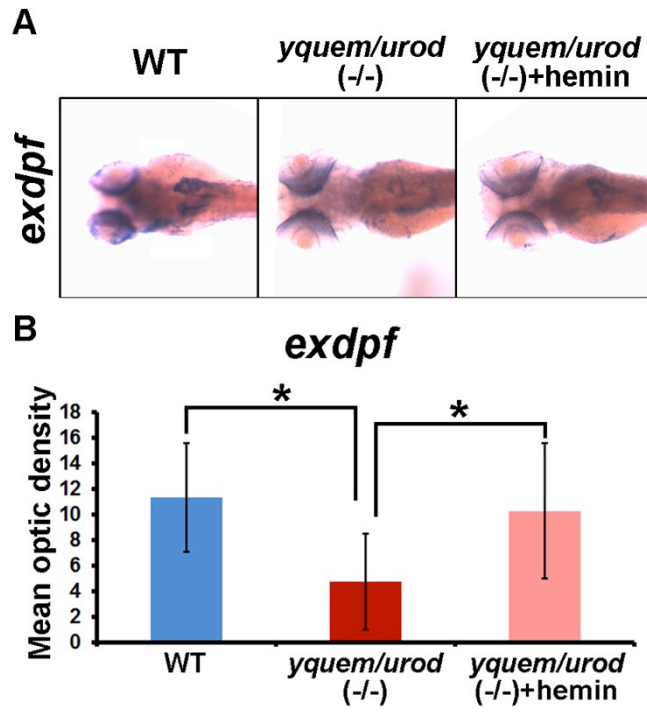

Source: https://cob.silverchair-cdn.com/cob/content_public/journal/dmm/7/7/10.1242_dmm.014951/4/dmm014951.pdf
